# Supplementary material
Source: ML conference proceedings conference paper supplement (https://proceedings.mlr.press/v97/reeve19a.html)
Supplement: Supplementary file [file reeve19a-supp.pdf]

## A. Proof of Theorem 5.1

The proof of Theorem 5.1 is as follows.

*Proof.* Define the input set of disagreement with margin  $\theta$ :

$$\mathcal{A}_\theta(\eta, \eta_{\text{corr}}) := \left( \left\{ \eta(x) \leq \frac{1}{2} - \theta \right\} \cap \left\{ \eta_{\text{corr}}(x) \geq \frac{1}{2} + \theta \right\} \right) \quad (13)$$

$$\cup \left( \left\{ \eta(x) \geq \frac{1}{2} + \theta \right\} \cap \left\{ \eta_{\text{corr}}(x) \leq \frac{1}{2} - \theta \right\} \right). \quad (14)$$

We can write  $\mathcal{A}_0(\eta, \eta_{\text{corr}})$  as a union of such sets:  $\mathcal{A}_0(\eta) = \bigcup_{\theta > 0} \mathcal{A}_\theta(\eta)$ , and hence

$$\lim_{\theta \rightarrow 0} \{\mu(\mathcal{A}_\theta(\eta, \eta_{\text{corr}}))\} = \mu(\mathcal{A}_0(\eta, \eta_{\text{corr}})) > 0.$$

Now, take some  $\theta > 0$  s.t.  $\mathcal{A}_0(\eta, \eta_{\text{corr}}) > 0$ . Lemma A.1 below will show that

$$\mathcal{E}(\phi; \mathbb{P}_{(\mu, \eta)}) + \mathcal{E}(\phi; \mathbb{P}_{(\mu, \eta_{\text{corr}})}) \geq \theta \cdot \mu(\mathcal{A}_\theta(\eta, \eta_{\text{corr}})) > 0. \quad (15)$$

Since  $\hat{\phi}$  is consistent with  $\mathbb{P}_{\text{train}} = \mathbb{P}_{\text{test}} = \mathbb{P}_{(\mu, \eta_{\text{corr}})}$ , we have  $\lim_{n \rightarrow \infty} \mathcal{E}(\hat{\phi}_n; \mathbb{P}_{(\mu, \eta_{\text{corr}})}) = 0$ . Hence, from eq. (15) it follows that  $\limsup_{n \rightarrow \infty} \mathcal{E}(\hat{\phi}_n; \mathbb{P}_{(\mu, \eta)}) \geq \theta \cdot \mu(\mathcal{A}_\theta(\eta, \eta_{\text{corr}})) > 0$ . That is,  $\hat{\phi}$  is inconsistent when trained with train distribution  $\mathbb{P}_{(\mu, \eta_{\text{corr}})}$  and tested on distribution  $\mathbb{P}_{(\mu, \eta)}$ .  $\square$

It remains to prove the lemma used in the proof above.

**Lemma A.1.** *Let  $\mu$  be a Borel probability measure on  $\mathcal{X}$ . Given  $\eta : \mathcal{X} \rightarrow [0, 1]$  and  $\theta > 0$  consider the set  $\mathcal{A}_\theta(\eta, \eta_{\text{corr}}) \subseteq \mathcal{X}$  as defined in eq. (14). Then given any classifier  $\phi : \mathcal{X} \rightarrow \{0, 1\}$  we have  $\mathcal{E}(\phi; \mathbb{P}_{(\mu, \eta)}) + \mathcal{E}(\phi; \mathbb{P}_{(\mu, \eta_{\text{corr}})}) \geq \theta \cdot \mu(\mathcal{A}_\theta(\eta, \eta_{\text{corr}}))$ .*

*Proof.* Recall that, for any regression function  $\tilde{\eta} : \mathcal{X} \rightarrow [0, 1]$  the excess risk can be written as:  $\mathcal{E}(\phi; \mathbb{P}_{(\mu, \tilde{\eta})}) =$

$$\int \left| \tilde{\eta}(x) - \frac{1}{2} \right| \cdot \mathbb{1} \left\{ \left( \tilde{\eta}(x) - \frac{1}{2} \right) \left( \phi(x) - \frac{1}{2} \right) < 0 \right\} d\mu(x). \quad (16)$$

Now if  $x \in \mathcal{A}_\theta(\eta, \eta_{\text{corr}})$  then  $(\eta(x) - \frac{1}{2})(\eta_{\text{corr}}(x) - \frac{1}{2}) < 0$  so for both possible values  $\phi(x) \in \{0, 1\}$  we have

$$\mathbb{1} \left\{ \left( \eta(x) - \frac{1}{2} \right) \left( \phi(x) - \frac{1}{2} \right) < 0 \right\} + \mathbb{1} \left\{ \left( \eta_{\text{corr}}(x) - \frac{1}{2} \right) \left( \phi(x) - \frac{1}{2} \right) < 0 \right\} = 1.$$

Moreover, if  $x \in \mathcal{A}_\theta(\eta, \eta_{\text{corr}})$  then  $\min \left\{ \left| \eta(x) - \frac{1}{2} \right|, \left| \eta_{\text{corr}}(x) - \frac{1}{2} \right| \right\} \geq \theta$  and so

$$\left| \eta(x) - \frac{1}{2} \right| \cdot \mathbb{1} \left\{ \left( \eta(x) - \frac{1}{2} \right) \left( \phi(x) - \frac{1}{2} \right) < 0 \right\} + \left| \eta_{\text{corr}}(x) - \frac{1}{2} \right| \cdot \mathbb{1} \left\{ \left( \eta_{\text{corr}}(x) - \frac{1}{2} \right) \left( \phi(x) - \frac{1}{2} \right) < 0 \right\} \geq \theta. \quad (17)$$

Integrating with respect to  $\mu$  and applying (16) to both  $\mathbb{P}_{(\mu, \eta)}$  and  $\mathbb{P}_{(\mu, \eta_{\text{corr}})}$  gives the conclusion of the lemma.  $\square$

## B. Proof of Lemma 3.1

*Proof.* Given  $\hat{a}, a \in [-1, 1]$ ,  $b, \hat{b} > 0$  with  $|\hat{b} - b| \leq b/2$ , and  $a/b \in [0, 1]$ ,

$$\left| \frac{\hat{a}}{\hat{b}} - \frac{a}{b} \right| = \frac{1}{\hat{b}} \cdot \left| (\hat{a} - a) + \frac{a}{b} \cdot (b - \hat{b}) \right| \leq \frac{2}{b} \left( |\hat{a} - a| + \left| \frac{a}{b} \right| \cdot |\hat{b} - b| \right) \leq \frac{4}{b} \cdot \max \{ |\hat{a} - a|, |\hat{b} - b| \}, \quad (18)$$

where we have used the fact that  $\hat{b} \geq b/2$ . By the definition of  $\hat{\eta}(x)$  together with eq. (1) we have

$$\hat{\eta}(x) := \frac{\hat{\eta}_{\text{corr}}(x) - \hat{p}_0}{1 - \hat{p}_0 - \hat{p}_1} \quad \text{and} \quad \eta(x) = \frac{\eta_{\text{corr}}(x) - p_0}{1 - p_0 - p_1}.$$

Now take  $\hat{a} = \hat{\eta}_{\text{corr}}(x) - \hat{p}_0$ ,  $a = \eta_{\text{corr}}(x) - p_0$ ,  $\hat{b} = 1 - \hat{p}_0 - \hat{p}_1$  and  $b = 1 - p_0 - p_1$ . Given the assumptions that  $p_0 + p_1 < 1$ , so  $b > 0$  and  $\max \{ |\hat{p}_0 - p_0|, |\hat{p}_1 - p_1| \} \leq (1 - p_0 - p_1) / 4$  this implies

$$|\hat{b} - b| = 2 \cdot \max \{ |\hat{p}_0 - p_0|, |\hat{p}_1 - p_1| \} \leq \frac{1}{2} \cdot (1 - p_0 - p_1) = \frac{b}{2},$$

which also implies  $\hat{b} \geq b/2 > 0$ . Hence, by (18) we deduce

$$\begin{aligned} |\hat{\eta}(x) - \eta(x)| &\leq \frac{4}{1 - p_0 - p_1} \cdot \max \{ |(\hat{\eta}_{\text{corr}}(x) - \hat{p}_0) - (\eta_{\text{corr}}(x) - p_0)|, |(1 - \hat{p}_0 - \hat{p}_1) - (1 - p_0 - p_1)| \} \\ &\leq \frac{8}{1 - p_0 - p_1} \cdot \max \{ |\hat{\eta}_{\text{corr}}(x) - \eta_{\text{corr}}(x)|, |\hat{p}_0 - p_0|, |\hat{p}_1 - p_1| \}. \end{aligned}$$

This completes the proof of Lemma 3.1. □
